# Supplementary material for: Sustained activation of STAT5 is essential for chromatin remodeling and maintenance of mammary-specific function
Source: PubMed Central journal article supplement — J Cell Biol. 2009 Jan 12;184(1):57–66. doi: 10.1083/jcb.200807021 (PMC2615090; doi:10.1083/jcb.200807021), 2009-01-12
Supplement: jcb.200807021_1.pdf [file jcb.200807021_1.pdf]

Xu et al., <http://www.jcb.org/cgi/content/full/jcb.200807021/DC1>

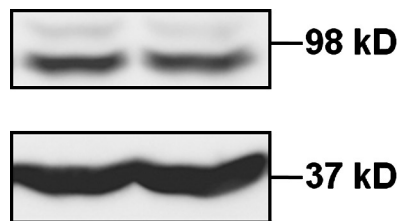

Figure S1. **IrECM treatment has little effect on PrlR expression.** Western blot analysis of PrlR in EPH4 cells on plastic that were treated with Prl alone (Ctrl) or with Prl plus 5% IrECM for 24 h.

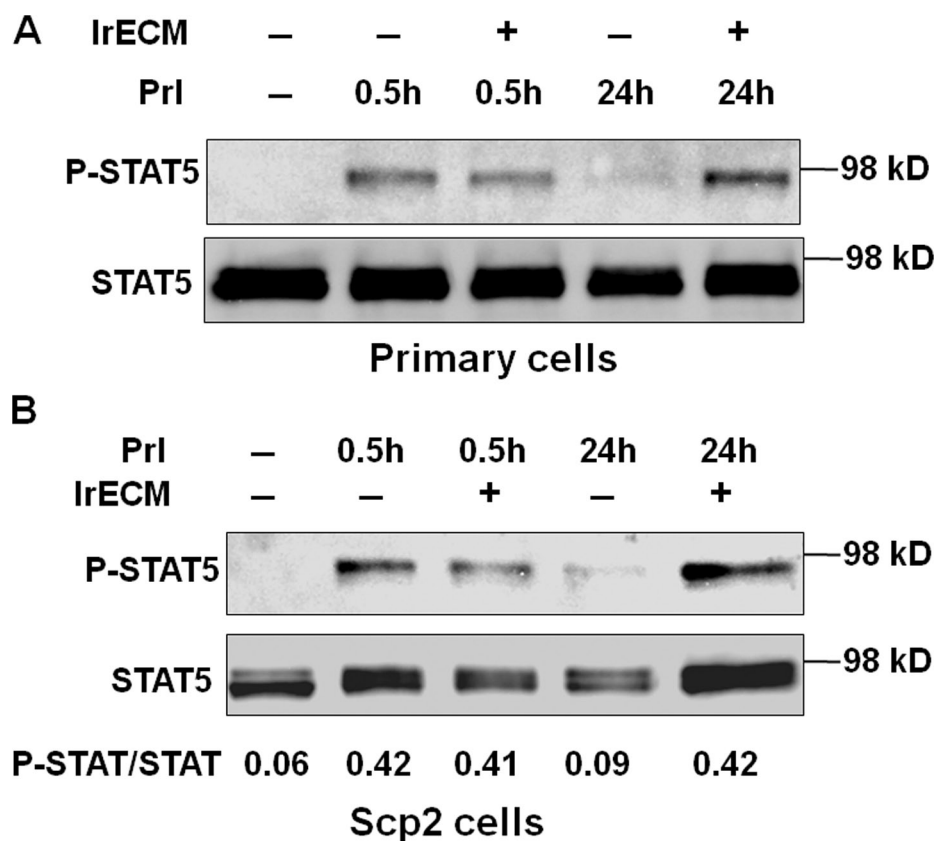

Figure S2. **Sustained STAT5 phosphorylation is activated in both primary cultures of mammary epithelial cells as well as in Scp2 in response to IrECM and Prl treatment.** Western blot analysis of STAT5 reactivation in primary mammary epithelial cells (A) and Scp2 cells (B).

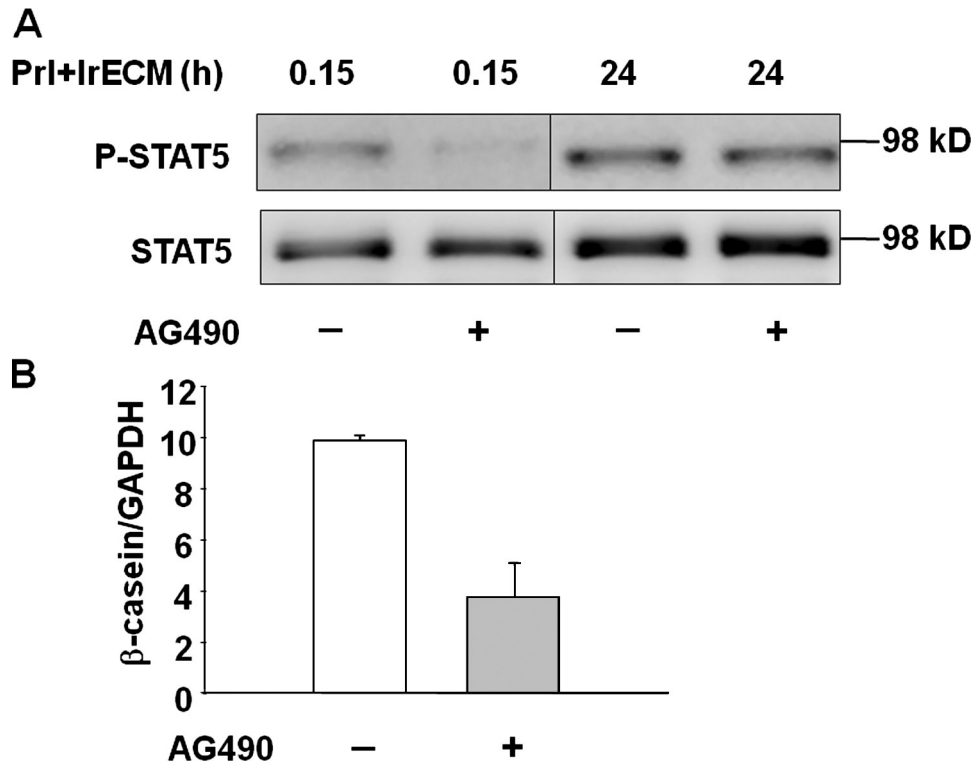

Figure S3. **Blocking the transient STAT5 activation with 25  $\mu$ M AG490 inhibited  $\beta$ -casein transcription.** (A) Western blot analysis of STAT5 phosphorylation in control and AG490-treated cells. (B) Real-time RT-PCR quantifying  $\beta$ -casein mRNA levels after blocking the transient activation. The bar graph represents the mean  $\pm$  SEM.

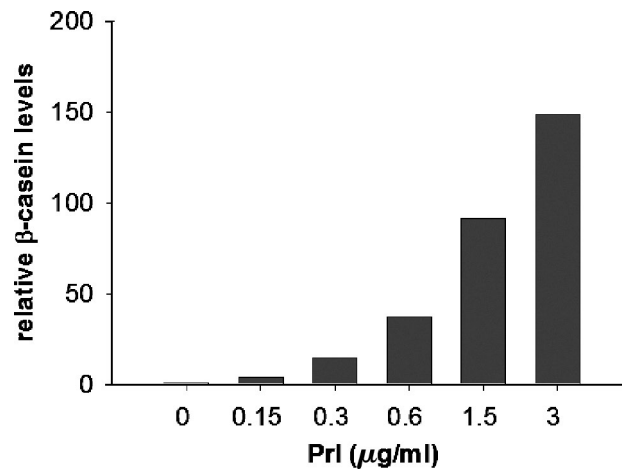

Figure S4. **Prl induces  $\beta$ -casein expression in a dose-dependent manner in 3D IrECM.** EpH4 cells were treated with IrECM plus different concentration of Prl for 48 h on polyHEMA, and  $\beta$ -casein mRNA levels were measured by real-time RT-PCR.
